# Supplementary material for: Honey bee predisposition of resistance to ubiquitous mite infestations
Source: PubMed Central journal article supplement (PMC6534585; doi:10.1038/s41598-019-44254-8), 2019-05-24
Supplement: 41598_2019_44254_MOESM1_ESM.pdf [file 41598_2019_44254_MOESM1_ESM.pdf]

1 **Supporting Information**

2 **Honey bee predisposition of resistance to ubiquitous mite infestations**

3 Bart J.G. Broeckx<sup>1,†,\*</sup>, Lina De Smet<sup>2,†</sup>, Tjeerd Blacquièrè<sup>3</sup>, Kevin Maebe<sup>4</sup>, Mikalai Khalenkow<sup>5</sup>,  
4 Mario Van Poucke<sup>1</sup>, Bjorn Dahle<sup>6,7</sup>, Peter Neumann<sup>8</sup>, Kim Bach Nguyen<sup>9</sup>, Guy Smagghe<sup>4</sup>,  
5 Dieter Deforce<sup>10</sup>, Filip Van Nieuwerburgh<sup>10</sup>, Luc Peelman<sup>1,‡</sup> & Dirk C. de Graaf<sup>2,5‡</sup>

6

7 <sup>1</sup>Department of Nutrition, Genetics and Ethology, Ghent University, B-9820 Merelbeke,  
8 Belgium; <sup>2</sup>Department of Biochemistry and Microbiology, Ghent University, B-9000 Ghent,  
9 Belgium; <sup>3</sup>Wageningen University & Research, 6708PB Wageningen, The Netherlands;  
10 <sup>4</sup>Department of Plants and Crops, Ghent University, B-9000, Ghent Belgium; <sup>5</sup>Honeybee  
11 Valley, Ghent University, B-9000 Ghent, Belgium; <sup>6</sup>Norwegian Beekeepers Association, NO-  
12 2040 Kløfta, Norway; <sup>7</sup>Department of Animal and Apicultural Sciences, Norwegian University  
13 of Science and Technology, NO-1432 Ås, Norway; <sup>8</sup>Institute of Bee Health, University of Bern,  
14 3097 Bern, Switzerland; <sup>9</sup>Department of Functional and Evolutionary Entomology, Gembloux  
15 Agro-Bio Tech, University of Liege, B-5030 Gembloux, Belgium; and <sup>10</sup>Department of  
16 Pharmaceutics, Ghent University, B-9000 Ghent, Belgium.

17

18 <sup>†,‡</sup> These authors contributed equally to this work.

19 \* Corresponding author: [Bart.Broeckx@ugent.be](mailto:Bart.Broeckx@ugent.be)

20 The supplementary information contains 7 tables and 6 figures.

21 **Fig. S1.**  $\Delta K$  calculated by the Evanno method with the Structure Harvester software<sup>1</sup>.

22

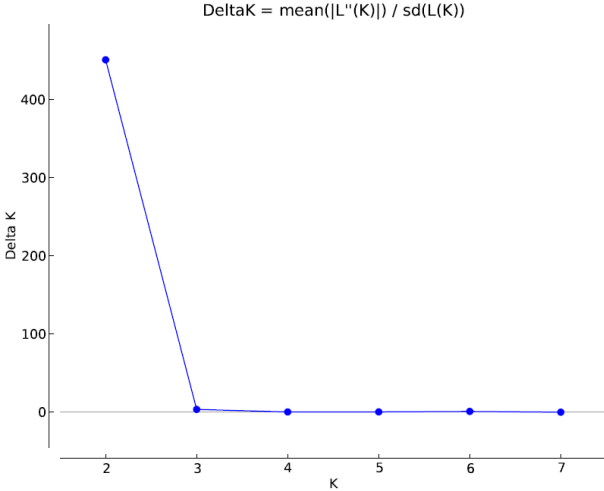

23

24

25 **Fig. S2** Relation between realized sequencing depth and the proportion of target base pairs  
26 for which this sequencing depth is reached.

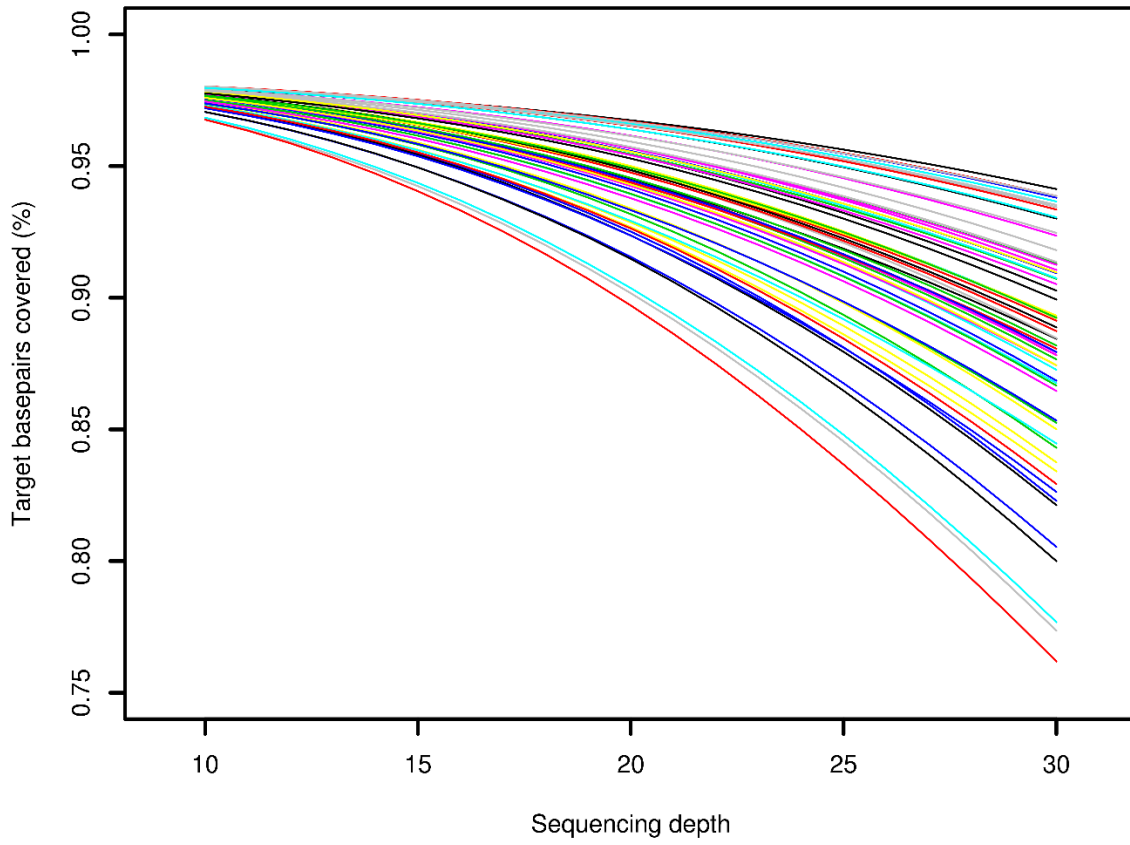

27

28 **Fig. S3** Relation between realized sequencing depth and the proportion of target regions that  
29 were entirely sequenced with at least the specified sequencing depth.

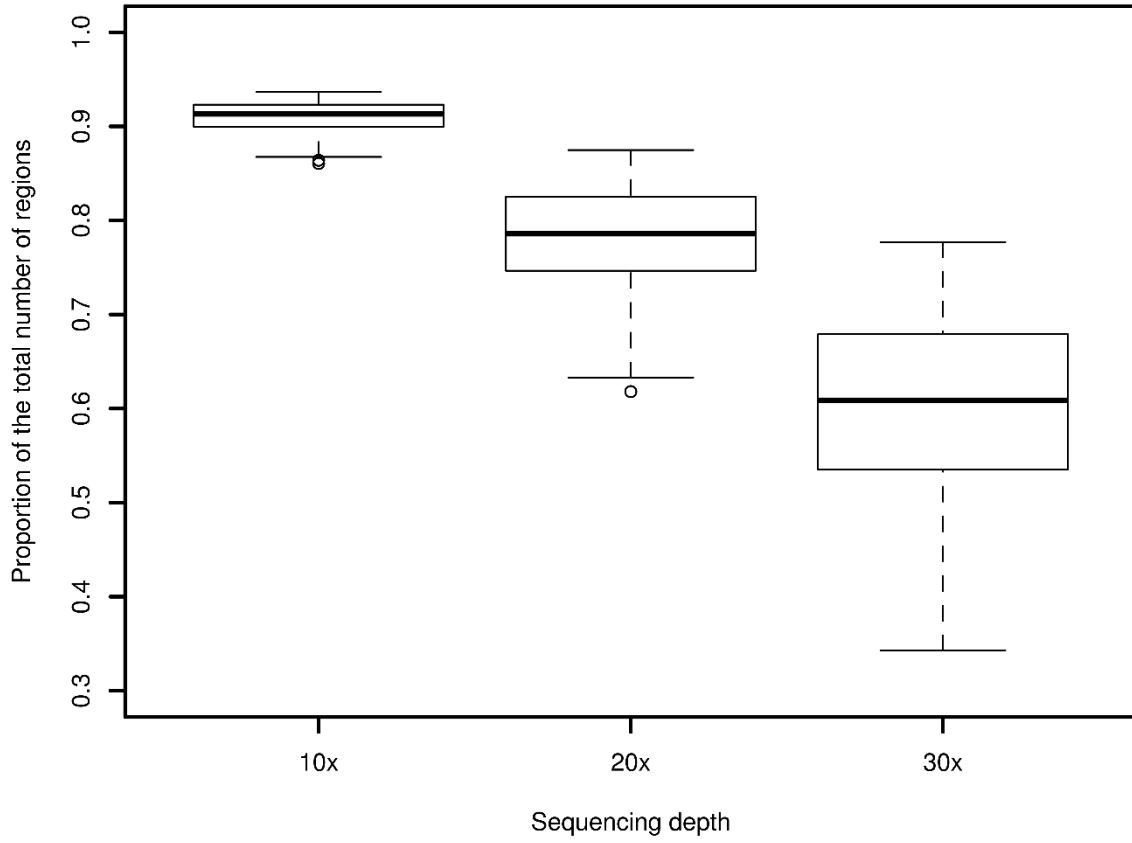

30

31 **Fig. S4.** Comparison of GC content (A), region size (B), repeat content (C) and ambiguous nucleotide content (D) for regions that are consistently  
32 sequenced at least 10x for all samples (“consistent”) relative to regions that never reach a sequencing depth of 10x (“bad”) and regions that have  
33 a varying sequencing depth (“variably”). Also see Table S5 for a numerical summary.

34

35

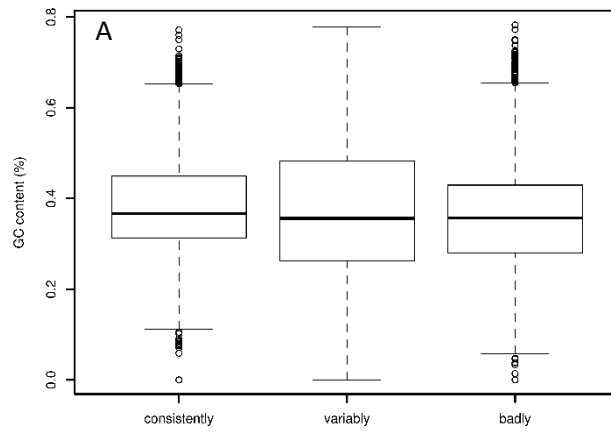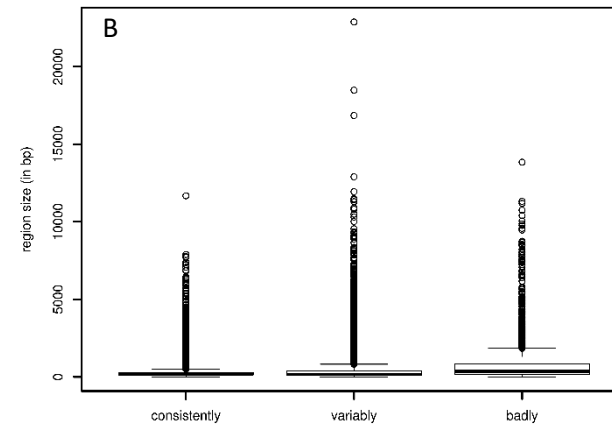

36

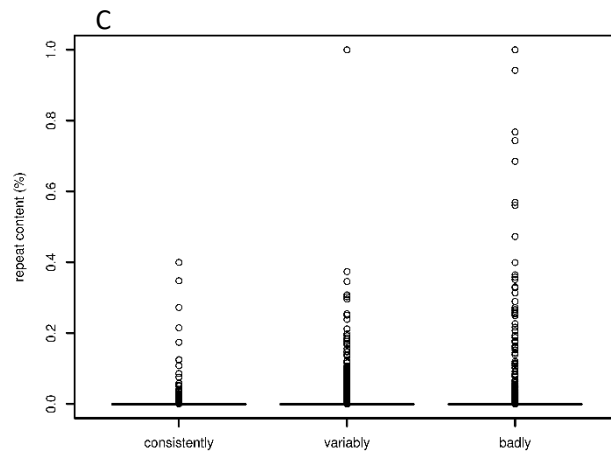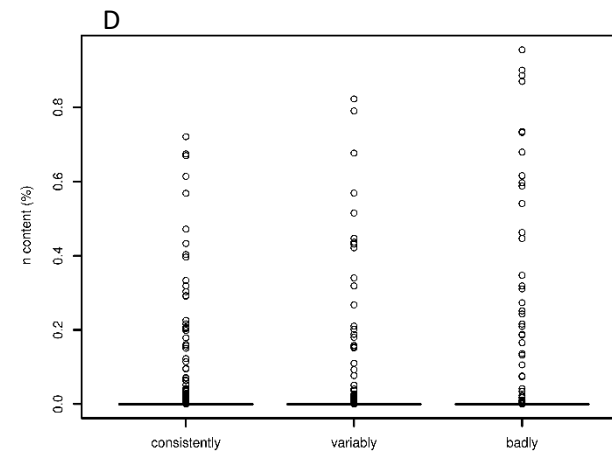

37 **Fig. S5. Distribution of distance between subsequent variants.** Only those variants that  
38 passed the filters were used (see methods section). Distances are expressed in bp.

39

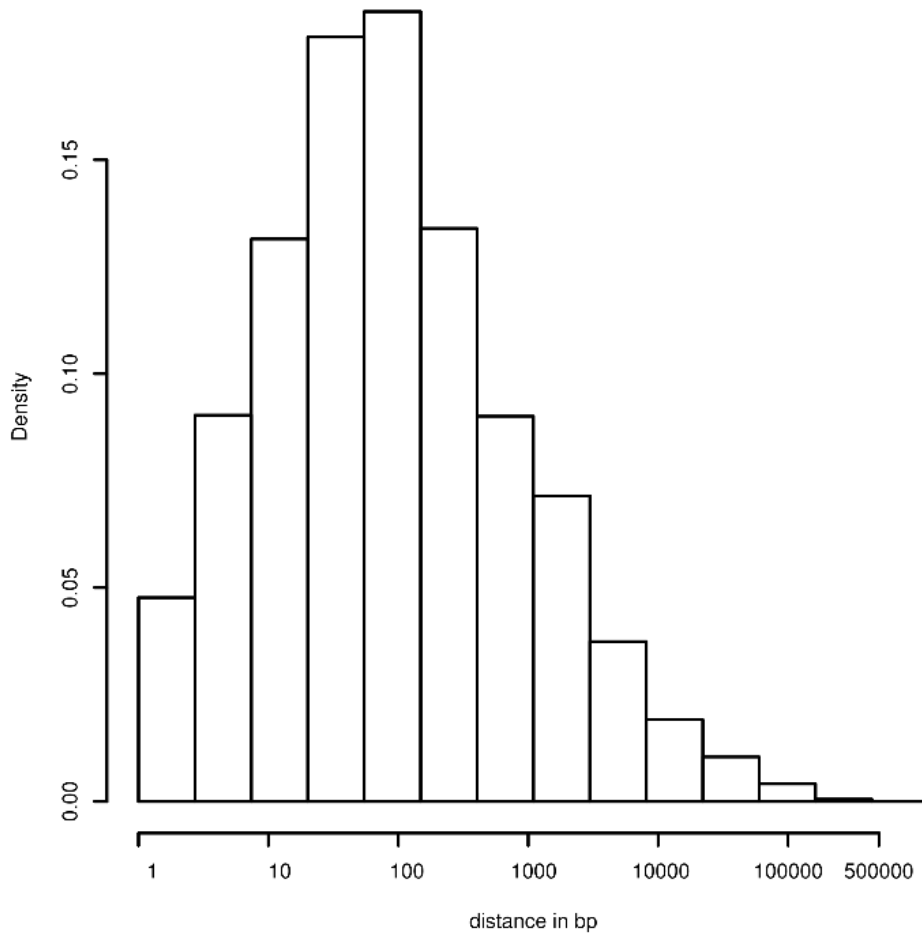

40

41 **Fig. S6. Manhattan plot.** The p-values were obtained using a Fisher exact test. The dashed line  
42 depicts the genome-wide significance threshold (corresponding to a Bonferroni-corrected p-  
43 value equal to  $0.05/140,151$  variants). The top 5 most significant variables were located on  
44 the two scaffolds plotted on the graph.

45

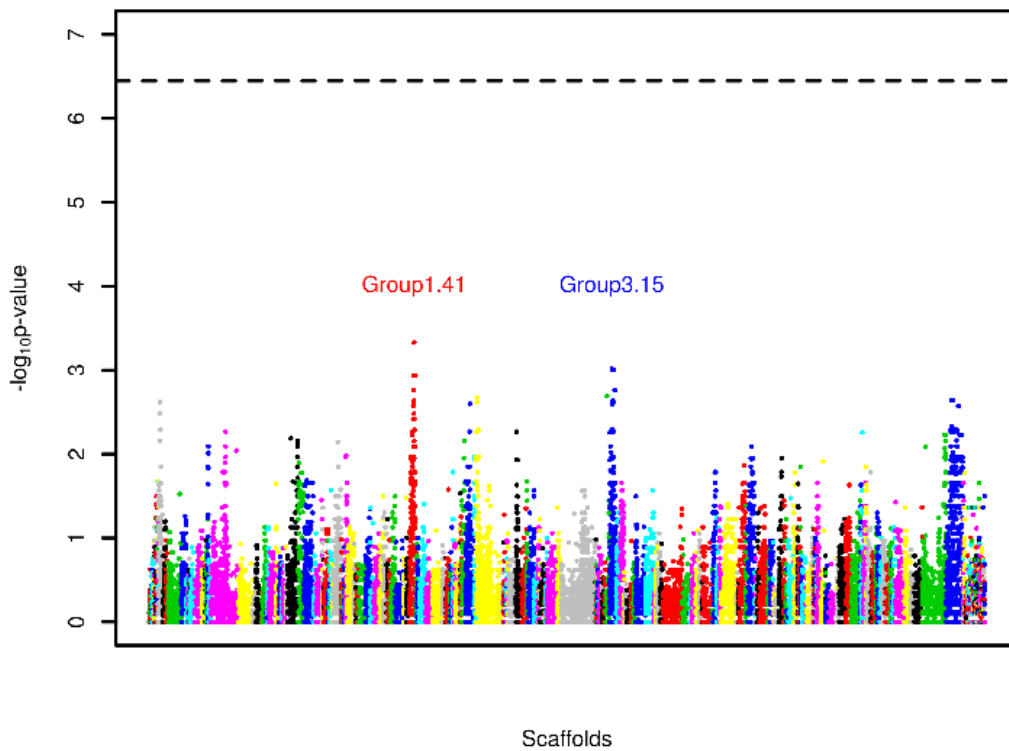

46



47 **Table S1.** *Varroa* reproductive success found in the F2 drone brood of the different genetic  
 48 stocks. Numbers in the first column correspond with the origin of the genetic stock as also  
 49 given in Fig. 1 (i.e. numbers 1-4 were *Varroa destructor*-resistant colonies; number 5 the  
 50 *Varroa*-sensitive control: 1. Østlandet Region, Norway; 2. Amsterdam Water Dunes, The  
 51 Netherlands; 3. Kapellen, Belgium; 4. Toulouse, France; 5. Ghent, Belgium). A Fisher exact test  
 52 was conducted to compare the frequency of reproductive and non-reproductive mites in  
 53 colony one to four relative to the control population of colony five. Significance was set at  $\alpha \leq$   
 54 0.05/4 (with Bonferroni correction for multiple testing).

55

| Origin | Total number of drone brood cells with mites | Drone brood cells with reproductive mites | Drone brood cells with non-reproductive mites | Percentage non-reproductive mites | Fisher Exact test p-value |
|--------|----------------------------------------------|-------------------------------------------|-----------------------------------------------|-----------------------------------|---------------------------|
| 1      | 139                                          | 95                                        | 44                                            | 31.6                              | 0.31                      |
| 2      | 69                                           | 34                                        | 35                                            | 51                                | 0.01                      |
| 3      | 28                                           | 24                                        | 4                                             | 14                                | 0.71                      |
| 4      | 24                                           | 15                                        | 9                                             | 37.5                              | 0.20                      |
| 5      | 21                                           | 17                                        | 4                                             | 19                                | reference                 |

56

57

58 **Table S2.** Overview of the different microsatellite loci.

59

| Loci  | Repeat                                                 | Label | Range   | Forward primer             | Reverse primer                   | Reference |
|-------|--------------------------------------------------------|-------|---------|----------------------------|----------------------------------|-----------|
| VD001 | (GA) <sub>10</sub> (GA) <sub>6</sub> (GA) <sub>5</sub> | VIC   | 170     | CCCGCGAACGAAATAAATAGAG     | AGCCACCTACGGTGCTCG               | 2         |
| VD015 | (GT) <sub>14</sub>                                     | VIC   | 164     | GCGCAAACCTTAACGCTCG        | TCAAGCCAGAGTGCTGCAG              | 2         |
| VD112 | (TC) <sub>16</sub> (AC) <sub>8</sub> (TC) <sub>4</sub> | FAM   | 160     | TAACTATGGCCTAGCGACGG       | CGTCGCTCATTATGGAACG              | 2         |
| VD114 | (CT) <sub>14</sub>                                     | PET   | 241     | GCAGATTAGGAAGAATAAGCCG     | CTCATAACGACACTTGCCATAGG          | 2         |
| VD146 | (AC) <sub>10</sub>                                     | NED   | 188-200 | TGGCTCATGCATTATCGTTG       | AGCGTTTGGAGAGTGAGAAATAC          | 2         |
| VD151 | (AC) <sub>7</sub> GT(TA) <sub>4</sub>                  | NED   | 133     | CGTTCAAGTATGCATACACACAC    | CTAGGCATATTGGGCACG               | 2         |
| VD163 | (CA) <sub>10</sub>                                     | FAM   | 130-132 | CAAGAGTCGGATTTGGCGC        | TAGTATGCTTCTATATATCTCTGAGTTTTTAT | 2         |
| VD305 | na                                                     | FAM   | 149     | ACGGTATCCACTGCGTGACT       | ATCATCAGTTGTTGCTCACCAC           | 3         |
| VD306 | na                                                     | NED   | 132     | TGGTTGATGACCAGAGTTTACG     | CTCGTCCTTGTTGCTATTGTTG           | 3         |
| VD307 | na                                                     | VIC   | 182-184 | CTAATACCACCAAATGCTTCCG     | CACAACAACAACAACAACAACG           | 3         |
| VJ275 | (TC) <sub>23</sub>                                     | NED   | 216-234 | CGTCATACGTCTTTTAACTATCAGAG | GTTTCGAGGCGTAAGAACAT             | 4         |
| VJ292 | (CT) <sub>18</sub> CC(CT) <sub>5</sub>                 | FAM   | 253-255 | TGAAAGCTGGTGTGAGTTACG      | GCCCCTGACAACATGAACTT             | 4         |
| VJ294 | (AG) <sub>23</sub>                                     | VIC   | 190-192 | GCTTCGTTCCGGTCTTTTGTC      | GCCTGACAGAATAGGCAAGC             | 4         |

60

61

62 **Table S3.** Genetic characterization of the *Varroa* mites from each studied colony. With  $n$  =  
63 number of mites genotyped,  $N_e$  = effective number of alleles,  $H_o$  = observed heterozygosity,  
64  $H_e$  = expected heterozygosity and  $F_{is}$  = inbreeding coefficient. Numbers in the first column  
65 refer to the origin of the genetic stock as given in Fig. 1, followed by information of the  
66 reproductive success of the examined mother mite: NR = non-reproductive; R = reproductive.  
67 SE = standard error.

68

| Colony | $n$ | $N_e$ |       | $H_o$ |       | $H_e$ |       | $F_{is}$ |       |
|--------|-----|-------|-------|-------|-------|-------|-------|----------|-------|
|        |     | Mean  | SE    | Mean  | SE    | Mean  | SE    | Mean     | SE    |
| 5: NR  | 4   | 1.182 | 0.098 | 0.077 | 0.044 | 0.101 | 0.054 | 0.200    | 0.128 |
| 5: R   | 4   | 1.236 | 0.140 | 0.000 | 0.000 | 0.111 | 0.060 | 1.000    | 0.000 |
| 3: NR  | 4   | 1.145 | 0.098 | 0.019 | 0.019 | 0.075 | 0.050 | 0.733    | 0.105 |
| 3: R   | 4   | 1.328 | 0.141 | 0.000 | 0.000 | 0.169 | 0.064 | 1.000    | 0.000 |
| 2: NR  | 10  | 1.502 | 0.249 | 0.015 | 0.015 | 0.186 | 0.077 | 0.943    | 0.035 |
| 2: R   | 10  | 1.232 | 0.119 | 0.008 | 0.008 | 0.123 | 0.058 | 0.928    | 0.040 |
| 1: NR  | 10  | 1.299 | 0.186 | 0.008 | 0.008 | 0.125 | 0.064 | 0.737    | 0.146 |
| 1: R   | 10  | 1.384 | 0.219 | 0.031 | 0.024 | 0.147 | 0.071 | 0.765    | 0.106 |
| Mean   | 8   | 1.289 | 0.044 | 0.020 | 0.010 | 0.130 | 0.014 | 0.788    | 0.100 |

69

70

71 **Table S4.** Relation between realized sequencing depth and the proportion of target base pairs  
 72 (% of target bp) and the proportion of entirely sequenced target regions (% of regions) for  
 73 which this sequencing depth is reached for individual samples.

74

|                | Sequencing depth |      |      |
|----------------|------------------|------|------|
| % of target bp | ≥10x             | ≥20x | ≥30x |
| Q1             | 97.4             | 93.7 | 86.1 |
| Median         | 97.7             | 94.8 | 88.6 |
| Q3             | 97.8             | 95.7 | 91.1 |
| % of regions   |                  |      |      |
| Q1             | 90.0             | 75.0 | 54.1 |
| Median         | 91.3             | 78.6 | 60.9 |
| Q3             | 92.3             | 82.4 | 67.8 |

75

76 **Table S5.** Comparison of GC content, region size, repeat content and ambiguous nucleotide  
77 content (“Ns”) (D) for regions that are consistently sequenced at least 10x for all samples  
78 (“consistent”) relative to regions that never reach a sequencing depth of 10x (“bad”) and  
79 regions that have a varying sequencing depth (“variably”). Also see Fig. S3 for a graphical  
80 representation.

81

| Regions    | Median GC (Q1-Q3)  | Median region size (Q1 – Q3) | Repeats (%) | Ns (%) |
|------------|--------------------|------------------------------|-------------|--------|
| Consistent | 0.37 (0.31 – 0.45) | 194 (133 – 288)              | 0.2%        | 0.2%   |
| Variably   | 0.36 (0.26 – 0.48) | 164 (92 – 382)               | 3.7%        | 0.6%   |
| Bad        | 0.36 (0.28 – 0.43) | 363 (148 – 826)              | 10.8%       | 3.2%   |

82

83

84 **Table S6.** Primers used to assess the fold enrichment.

85

| Gene    | Forward               | Reverse              | Reference    |
|---------|-----------------------|----------------------|--------------|
| Actin   | TGCCAACACTGTCCTTCTG   | AGAATTGACCCACCAATCCA | <sup>5</sup> |
| Enolase | GGTGATGAAGGTGGTTTTGC  | GATGCAGCAACATCCATACC | <sup>6</sup> |
| GAPDH   | GATGCACCCATGTTTGTGTTG | TTTGCAGAAGGTGCATCAAC | <sup>7</sup> |
| eIF3-S8 | TGAGTGTCTGCTATGGATTGC | TCGCGGCTCGTGGTA      | <sup>7</sup> |

86

**Table S7.** Primers used in the population study.

| Gene                    | Forward                    | Reverse                     |
|-------------------------|----------------------------|-----------------------------|
| Group1.41<br>(GB54921)  | ACTTTTAGTCAGAAAATAGTAACGAG | TTCCGAAGAAGACTGGGAAA        |
| Group10.23<br>(GB48382) | ATGGGAAACAGGAAAAGGTGGAGAGT | AGCACACCAACAGCCGAGTGA       |
| Group15.14<br>(GB50526) | AGGAACGGGAGCGAGGATACGG     | TCACCGAGGACGAGGAAGTAGCG     |
| Group15.19<br>(GB50114) | TCAGCCGACGAGGAGGAGTCG      | TCAGGGAGTCGAGGAACGTGTCCG    |
| Group3.15<br>(GB47018)  | ACGCCTCGAATCCGCCTTTG       | AGGAGTTGTTGTTTCTTTCGTGTCTCA |
| Group9.12<br>(GB53345)  | GCGCGTTCATTGGTCTATTCGT     | TCAGCATCGTCCTGGCGTAG        |
| Group9.12<br>(GB53340)  | ATCAGGCGTTCGAGGCTGAGA      | AGGATGTTGACCGAGGCCAGA       |

The two variants at Group1.41 were genotyped with the same primer pair.

## References

1. Earl, D. A. & vonHoldt, B. M. STRUCTURE HARVESTER: A website and program for visualizing STRUCTURE output and implementing the Evanno method. *Conserv. Genet. Resour.* **4**, 359–361 (2012).
2. Solignac, M. *et al.* Characterization of microsatellite markers for the apicultural pest *Varroa destructor* (Acari: Varroidae) and its relatives. *Mol. Ecol. Notes* **3**, 556–559 (2003).
3. Cornman, S. R. *et al.* Genomic survey of the ectoparasitic mite *Varroa destructor*, a major pest of the honey bee *Apis mellifera*. *BMC Genomics* **11**, 602 (2010).
4. Evans, J. D. Microsatellite loci in the honey bee parasitic mite *Varroa jacobsoni*. *Mol. Ecol.* **9**, 1436–1438 (2000).
5. Cunha, A. D., Nascimento, A. M., Guidugli, K. R., Simões, Z. L. P. & Bitondi, M. M. G.

Molecular cloning and expression of a hexamerin cDNA from the honey bee, *Apis mellifera*. *J. Insect Physiol.* **51**, 1135–1147 (2005).

6. Scharlaken, B. *et al.* Reference Gene Selection for Insect Expression Studies Using Quantitative Real-Time PCR: The Head of the Honeybee, *Apis mellifera* , After a Bacterial Challenge. *J. Insect Sci.* **8**, 1–10 (2008).
7. Fischer, P. & Grozinger, C. M. Pheromonal regulation of starvation resistance in honey bee workers (*Apis mellifera*). *Naturwissenschaften* **95**, 723–729 (2008).
